# Supplementary figures and images for: EYA1 and SIX1 drive the neuronal developmental program in cooperation with the SWI/SNF chromatin-remodeling complex and SOX2 in the mammalian inner ear
Source: Oxford University Press journal article supplement (doi:10.1242/dev.071670), 2012-04-19

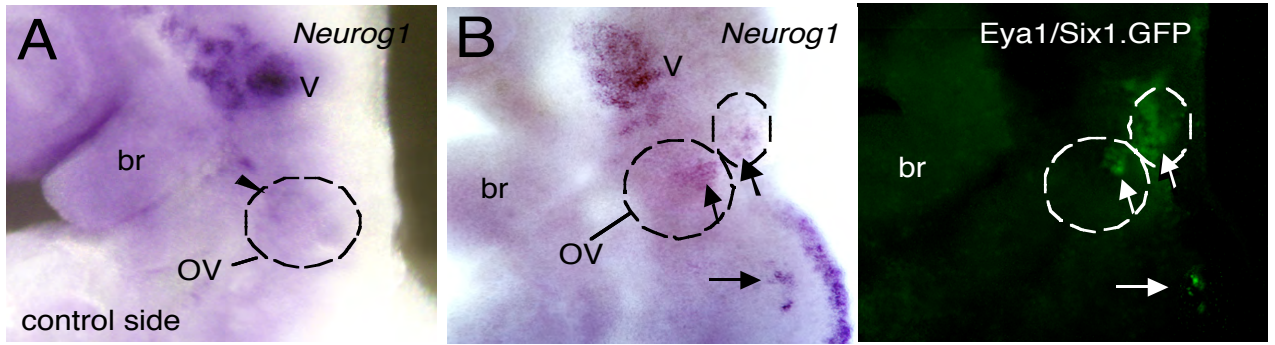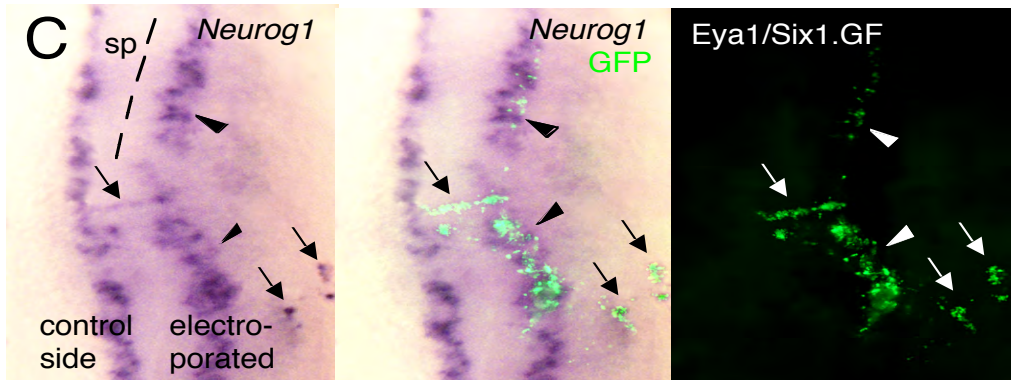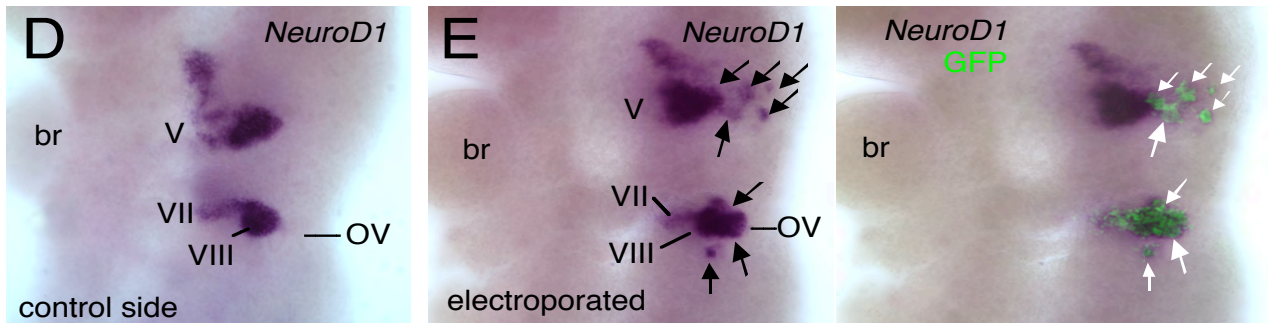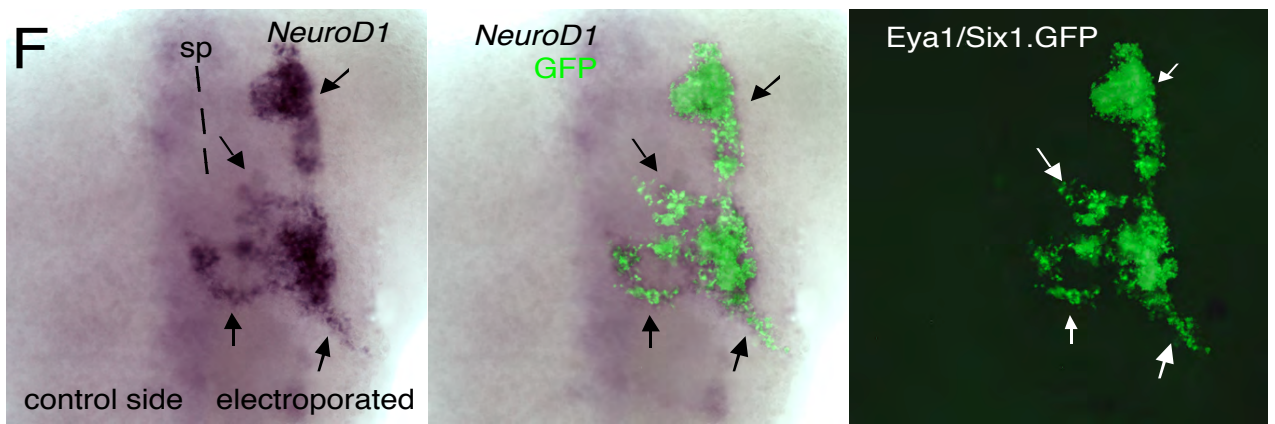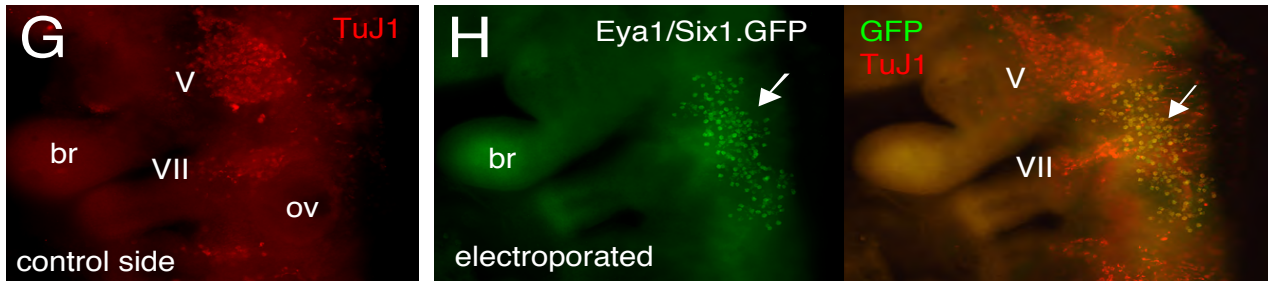

Supplement: dev071670figs1.pdf [file dev071670figs1.pdf]

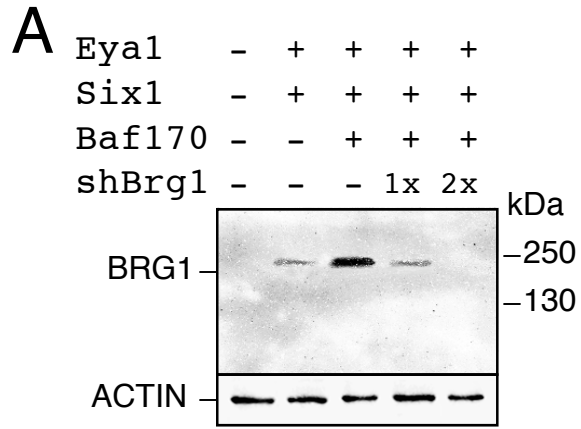

**B** Coomassie staining

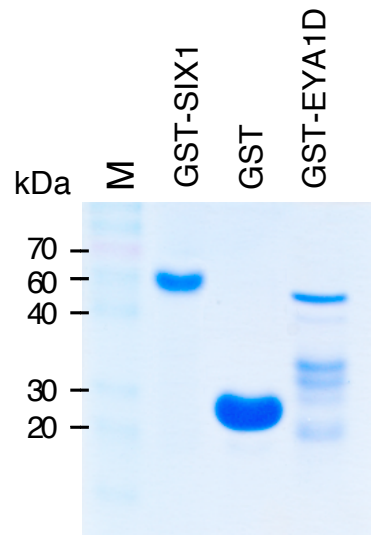

**C** Co-IP with E13.5 cochlear cell extracts

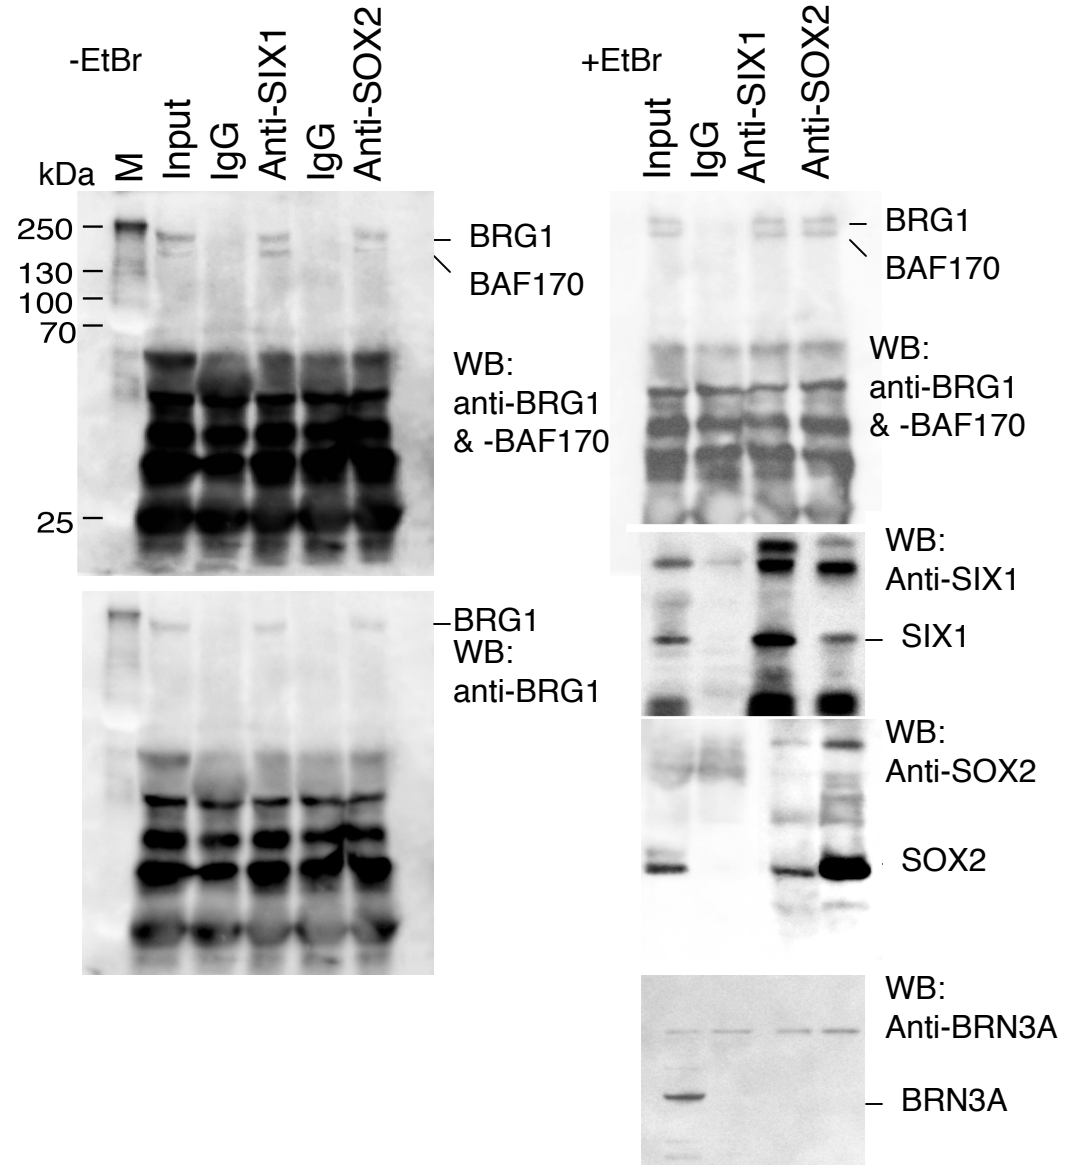

Supplement: dev071670figs2.pdf [file dev071670figs2.pdf]

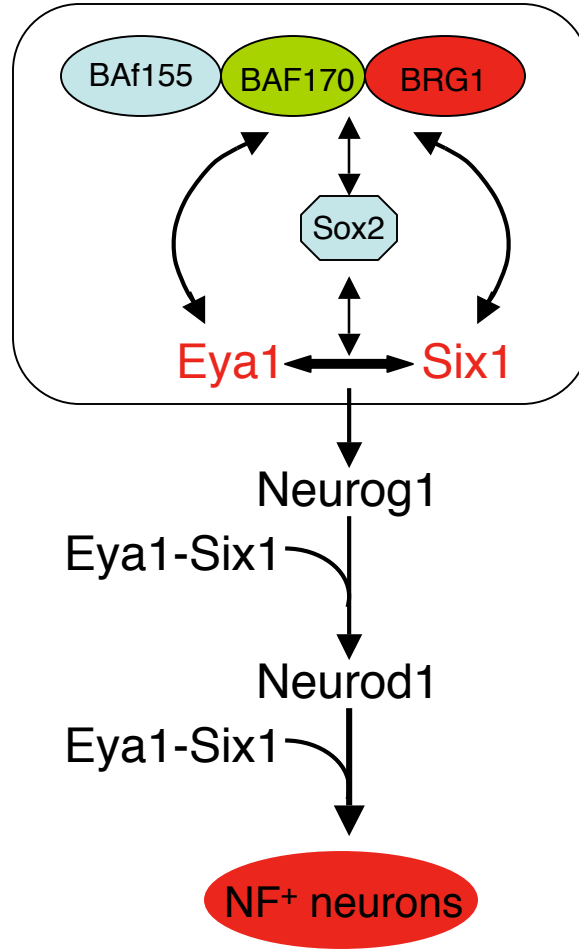

Supplement: dev071670figs3.pdf [file dev071670figs3.pdf]
